# Supplementary material
Source: PubMed Central journal article supplement (PMC7522647)
Supplement: mmc1.pdf [file mmc1.pdf]

## Markers of myocardial injury in the prediction of short-term COVID-19 prognosis

## SUPPLEMENTARY DATA

Table 1 of the supplementary data

Complications by abnormal hs-cTnT and NT-proBNP

|                      | Total      | Died      | Mechanical ventilation | Other ventilatory support | Hospitalised in non-ICU wards | Discharged to a hospital-at-home program | <i>P</i> |
|----------------------|------------|-----------|------------------------|---------------------------|-------------------------------|------------------------------------------|----------|
|                      | n = 651    | n = 80    | n = 47                 | n = 57                    | n = 416                       | n = 51                                   |          |
| hs-cTnT > 14ng/l     | 225 (34.6) | 66 (82.5) | 22 (46.8)              | 20 (35.1)                 | 115 (27.6)                    | 2 (3.92)                                 | <.001    |
| hs-cTnT ≤ 14ng/l     | 426 (65.4) | 14 (17.5) | 25 (53.2)              | 37 (64.9)                 | 301 (72.4)                    | 49 (96.1)                                |          |
|                      | n = 506    | n = 67    | n = 43                 | n = 40                    | n = 308                       | n = 48                                   |          |
| NT-proBNP > 300pg/mL | 183 (36.2) | 58 (86.6) | 20 (46.5)              | 15 (37.5)                 | 86 (27.9)                     | 4 (8.33)                                 | <.001    |
| NT-proBNP ≤ 300pg/mL | 323 (63.8) | 9 (13.4)  | 23 (53.5)              | 25 (62.5)                 | 222 (72.1)                    | 44 (91.7)                                |          |

hs-cTnT, high-sensitivity cardiac-specific troponin-T; NT-proBNP, N-terminal pro-B-type natriuretic peptide; ICU, intensive care unit.

Values are expressed as No. (%=

Table 2 of the supplementary data

Diagnostic test accuracy for hs-cTnT and NT-proBNP and mortality and death or mechanical ventilation

|                                        | 30 days  |            |              | 50 days  |            |              |
|----------------------------------------|----------|------------|--------------|----------|------------|--------------|
|                                        | Estimate | 95%CI, low | 95%CI, upper | Estimate | 95%CI, low | 95%CI, upper |
| <b>Mortality</b>                       |          |            |              |          |            |              |
| <i>hs-cTnT &gt; 14 ng/L</i>            |          |            |              |          |            |              |
| Sensitivity, %                         | 86.95    | 78.99      | 94.90        | 78.76    | 68.29      | 89.22        |
| Specificity, %                         | 71.65    | 67.95      | 75.36        | 72.50    | 62.71      | 82.29        |
| PPV, %                                 | 26.77    | 20.96      | 32.58        | 29.96    | 20.80      | 39.13        |
| NPV, %                                 | 97.88    | 96.50      | 99.25        | 95.81    | 93.38      | 98.23        |
| <i>NT-proBNP &gt; 300 pg/mL</i>        |          |            |              |          |            |              |
| Sensitivity, %                         | 89.66    | 81.81      | 97.50        | 82.69    | 71.18      | 94.20        |
| Specificity, %                         | 71.01    | 66.79      | 75.23        | 68.52    | 56.12      | 80.92        |
| PPV, %                                 | 28.68    | 22.09      | 35.28        | 30.52    | 20.28      | 40.76        |
| NPV, %                                 | 98.14    | 96.67      | 99.62        | 95.95    | 92.86      | 99.04        |
| <b>Death or mechanical ventilation</b> |          |            |              |          |            |              |
| <i>hs-cTnT &gt; 14 ng/L</i>            |          |            |              |          |            |              |
| Sensitivity, %                         | 71.43    | 63.31      | 79.55        | 70.73    | 62.68      | 78.78        |
| Specificity, %                         | 73.50    | 69.69      | 77.31        | 76.39    | 66.57      | 86.21        |
| PPV, %                                 | 37.79    | 31.43      | 44.15        | 42.01    | 30.50      | 53.51        |
| NPV, %                                 | 91.94    | 89.35      | 94.54        | 91.52    | 88.72      | 94.32        |
| <i>NT-proBNP &gt; 300 pg/mL</i>        |          |            |              |          |            |              |
| Sensitivity, %                         | 72.82    | 64.21      | 81.42        | 73.34    | 64.95      | 81.73        |
| Specificity, %                         | 73.18    | 68.83      | 77.53        | 68.09    | 54.75      | 81.43        |
| PPV, %                                 | 41.15    | 33.99      | 48.30        | 39.23    | 27.65      | 50.82        |
| NPV, %                                 | 91.27    | 88.18      | 94.36        | 90.09    | 86.30      | 93.88        |

95%CI, 95% confidence interval; hs-cTnT: high-sensitivity cardiac-specific troponin-T; NPV, negative predictive value; NT-proBNP, N-terminal pro-B-type natriuretic peptide; PPV, positive predictive value.

**Figure 1 of the supplementary data**

Correlation between NT-proBNP and hs-cTnT

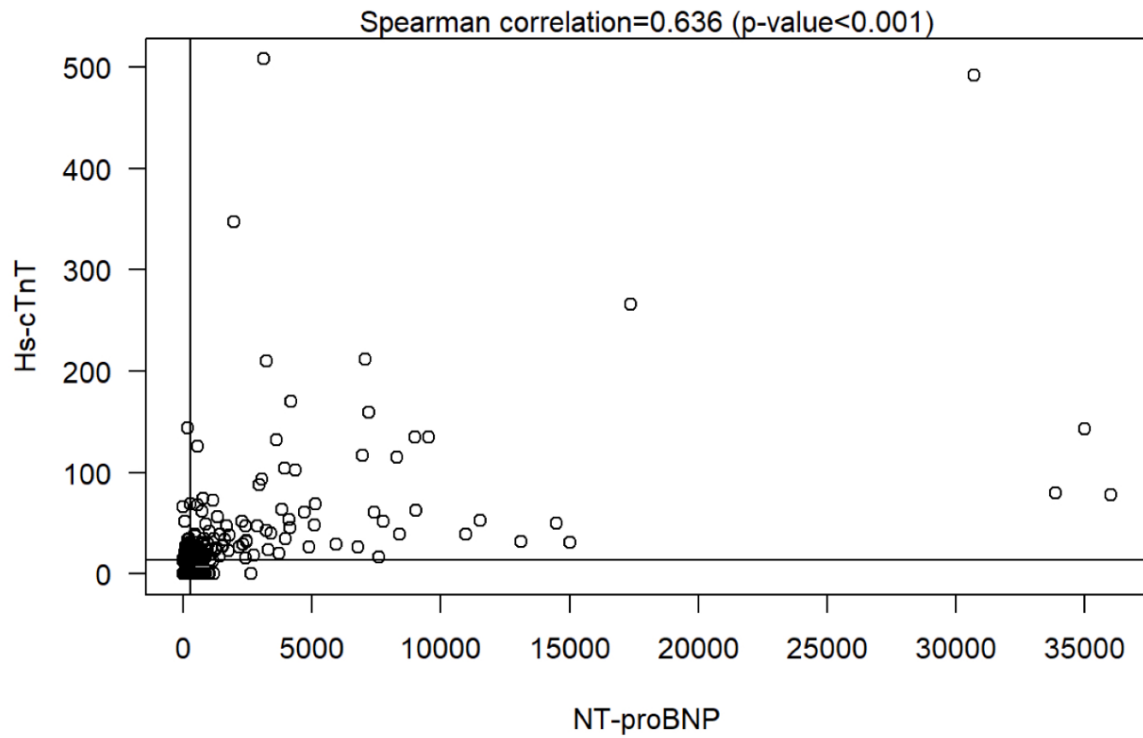

hs-cTnT: high-sensitivity cardiac-specific troponin-T; NT-proBNP, N-terminal pro-B-type natriuretic peptide.
